# Supplementary material
Source: MDPI journal article supplement (https://www.mdpi.com/2073-4344/11/11/1291)
Supplement: s1 [file s1]

## Supplementary Materials

### ***Cutaneotrichosporon oleaginosus*: a versatile whole-cell biocatalyst for the production of single cell oil from agro-industrial wastes**

Nicola Di Fidio <sup>1,\*</sup>, Filippo Minonne <sup>1</sup>, Claudia Antonetti <sup>1</sup> and Anna Maria Raspolli Galletti <sup>1,\*</sup>

<sup>1</sup> Department of Chemistry and Industrial Chemistry University of Pisa, Via Giuseppe Moruzzi 13, 56124 Pisa, Italy;

\* Correspondence: n.difidio@studenti.unipi.it (N.D.F.); anna.maria.raspolli.galletti@unipi.it; Tel.: +39- 50- 2219290 (A.M.R.G.)

**Table S1.** Summary of the most common pretreatment approaches for lignocellulosic biomasses.

| Pretreatment             | Optimal conditions                                                                          | Advantages                                                                                                                                                                                                                                           | Disadvantages                                                                                                                                                                                                                                 | Ref.    |
|--------------------------|---------------------------------------------------------------------------------------------|------------------------------------------------------------------------------------------------------------------------------------------------------------------------------------------------------------------------------------------------------|-----------------------------------------------------------------------------------------------------------------------------------------------------------------------------------------------------------------------------------------------|---------|
| Dilute acid pretreatment | H <sub>2</sub> SO <sub>4</sub> , HCl, CH <sub>3</sub> COOH<br>1-4 wt%, 50-60 °C, 30-120 min | High availability of catalyst, low consumption and cost of the catalyst, high efficiency of the catalyst                                                                                                                                             | Corrosion of the reactor, downstream process for acidic streams, high environmental impact, difficult catalyst recycling, production of sugars-degradation by-products with an inhibitory effect on yeast growth, effect on the SCO's profile | [1-3]   |
| Microwave irradiation    | H <sub>2</sub> SO <sub>4</sub> 0.5 wt%, 135-190 °C, 2-20 min; 635-1400 W, 2450 MHz          | Energy- and time-saving approach, versatile application in combination with others chemical, physical and biological processes                                                                                                                       | Low technology readiness level                                                                                                                                                                                                                | [4-7]   |
| Alkaline pretreatment    | NaOH, KOH, Ca(OH) <sub>2</sub> ,<br>1-3 wt%, 30-60 °C, 6-24 h                               | High availability of catalyst, low consumption and cost of the catalyst, good efficacy, good lignin destructuration                                                                                                                                  | Downstream process for basic streams, high environmental impact, difficult catalyst recycling                                                                                                                                                 | [8,9]   |
| Steam explosion          | 160-260 °C, 5–50 atm, 2-10 min                                                              | Low environmental impact, very effective in biomass destructuration, high improvement of enzymatic digestability of treated solid residue, no catalyst need, very short process time                                                                 | Energy-intensive process, production of sugars-degradation by-products with an inhibitory effect on yeast growth                                                                                                                              | [10,11] |
| Ionic liquid             | [Bmim][Cl] + [Bmim][OAc], [Emim][OAc], [triethylammonium]), 5-10 wt%, 80–160 °C, 1-22 h     | Versatile application in combination with other chemical and biological processes, low environmental impact, decrease in crystallinity of fibres, increase in biomass porosity, good improvement of enzymatic digestability of treated solid residue | High cost, difficult manipulation, negative effect on hydrolytic enzymes, difficult recycling                                                                                                                                                 | [12,13] |
| Organosolv               | Acetone, ethanol; $\gamma$ -valerolactone, 60-80 v/v%, 120-180 °C, 60-120 min               | Low environmental impact if based on green solvent, no catalyst need, high delignification degree, high improvement of enzymatic digestability of treated solid residue                                                                              | Use of high volume of solvents, loss of a part of the hemicellulose fraction, downstream process for solvent recycling                                                                                                                        | [14-16] |

**Table S2.** Summary of the main detoxification approaches used for the bioconversion of lignocellulosic hydrolysates.

| Detoxification method                   | Advantages                                                                                                                                                                       | Disadvantages                                                                                                                                                           | Ref.    |
|-----------------------------------------|----------------------------------------------------------------------------------------------------------------------------------------------------------------------------------|-------------------------------------------------------------------------------------------------------------------------------------------------------------------------|---------|
| Vacuum evaporation                      | Efficient for volatile compounds such as acetic acid, furfural and vanillin                                                                                                      | Not effective in the removal of non-volatile compounds (e.g. extractives and lignin derivatives)                                                                        | [10,17] |
| Membrane extraction                     | Effective for the reduction in the concentration of sulfuric acid, acetic acid, formic acid, levulinic acid, furfural and 5-HMF                                                  | Increase in the viscosity of the organic phase, energy-intensive process                                                                                                | [18]    |
| Overliming with Ca(OH) <sub>2</sub>     | Cost-effective method, effective for removal of organic acids                                                                                                                    | A slight loss of sugars (about 10 wt%) by adsorption on the precipitate                                                                                                 | [19]    |
| Activated carbon treatment              | High adsorption capacity of inhibitory compounds, without affecting the sugars concentration                                                                                     | The effectiveness of activated carbon treatment is strongly related to various process variables such as pH, contact time, temperature and liquid to solid weight ratio | [20]    |
| Ion-exchange resins                     | Greater specificity for organic and inorganic compounds                                                                                                                          | Expensive method                                                                                                                                                        | [21]    |
| Ethyl acetate extraction                | Effective removal of phenolic compounds                                                                                                                                          | Not effective for hydrophilic compounds                                                                                                                                 | [22]    |
| <i>in situ</i> microbial detoxification | Cost-effective and more sustainable method than chemical-physical processes, low number of side reactions due to the great selectivity of microorganisms, energy-saving approach | Considerable consumption of fermentable sugars                                                                                                                          | [23]    |
| Enzymatic purification                  | Effective removal of phenolic compounds, sustainable and energy-saving method, high selectivity                                                                                  | Low technology readiness level, high cost of enzymes                                                                                                                    | [24]    |

## References

1. Di Fidio, N.; Ragaglini, G.; Dragoni, F.; Antonetti, C.; Raspolli Galletti, A.M. Integrated cascade biorefinery processes for the production of single cell oil by *Lipomyces starkeyi* from *Arundo donax* L. hydrolysates. *Bioresour. Technol.* **2021**, *325*, 124635-124645.
2. Sheng, Y.; Tan, X.; Gu, Y.; Zhou, X.; Tu, M.; Xu, Y. Effect of ascorbic acid assisted dilute acid pretreatment on lignin removal and enzyme digestibility of agricultural residues. *Renew. Energy* **2021**, *163*, 732-739.
3. Ying, W.; Zhu, J.; Xu, Y.; Zhang, J. High solid loading enzymatic hydrolysis of acetic acid-peroxide/acetic acid pretreated poplar and cellulase recycling. *Bioresour. Technol.* **2021**, *340*, 125624-125632.
4. Longanesi, L.; Bouxin, F.P.; Fan, J.; Auta, H.; Gammons, R.; Abeln, F.; Budarin, V.L.; Clark, J.H.; Chuck, C.J. Scaled-Up Microwave-Assisted Pretreatment and Continuous Fermentation to Produce Yeast Lipids from Brewery Wastes. *Ind. Eng. Chem. Res.* **2020**, *59*, 19803-19816.
5. Di Fidio, N.; Raspolli Galletti, A.M.; Fulignati, S.; Licursi, D.; Liuzzi, F.; De Bari, I.; Antonetti, C. Multi-step exploitation of raw *Arundo donax* L. for the selective synthesis of second-generation sugars by chemical and biological route. *Catalysts* **2020**, *10*, 79-101.
6. Di Fidio, N.; Fulignati, S.; De Bari, I.; Antonetti, C.; Raspolli Galletti, A.M. Optimisation of glucose and levulinic acid production from the cellulose fraction of giant reed (*Arundo donax* L.) performed in the presence of ferric chloride under microwave heating. *Bioresour. Technol.* **2020**, *313*, 123650-123658.
7. Di Fidio, N.; Antonetti, C.; Raspolli Galletti, A.M. Microwave-assisted cascade exploitation of giant reed (*Arundo donax* L.) to xylose and levulinic acid catalysed by ferric chloride. *Bioresour. Technol.* **2019**, *293*, 122050-122058.
8. Li, L.; Chen, C.; Zhang, R.; He, Y.; Wang, W.; Liu, G. Pretreatment of corn stover for methane production with the combination of potassium hydroxide and calcium hydroxide. *Energy Fuels* **2015**, *29*, 5841-5846.
9. Łukajtis, R.; Rybarczyk, P.; Kucharska, K.; Konopacka-Łyskawa, D.; Słupek, E.; Wychodnik, K.; Kamiński, M. Optimization of saccharification conditions of lignocellulosic biomass under alkaline pre-treatment and enzymatic hydrolysis. *Energies* **2018**, *11*, 886-912.
10. Di Fidio, N.; Liuzzi, F.; Mastrolitti, S.; Albergo, R.; De Bari, I. Single cell oil production from undetoxified *Arundo donax* L. hydrolysate by *Cutaneotrichosporon curvatus*. *J. Microbiol. Biotechnol.* **2019**, *29*, 256-267.
11. Raspolli Galletti, A.M.; Licursi, D.; Ciorba, S.; Di Fidio, N.; Coccia, V.; Cotana, F.; Antonetti, C. Sustainable Exploitation of Residual *Cynara cardunculus* L. to Levulinic Acid and n-Butyl Levulinate. *Catalysts* **2021**, *11*, 1082-1100.
12. Usmani, Z.; Sharma, M.; Gupta, P.; Karpichev, Y.; Gathergood, N.; Bhat, R.; Gupta, V.K. Ionic liquid based pretreatment of lignocellulosic biomass for enhanced bioconversion. *Bioresour. Technol.* **2020**, *304*, 123003-123015.
13. Sorn, V.; Chang, K.L.; Phitsuwan, P.; Ratanakhanokchai, K.; Dong, C.D. Effect of microwave-assisted ionic liquid/acidic ionic liquid pretreatment on the morphology, structure, and enhanced delignification of rice straw. *Bioresour. Technol.* **2019**, *293*, 121929-121936.
14. Meng, X.; Bhagia, S.; Wang, Y.; Zhou, Y.; Pu, Y.; Dunlap, J.R.; Shuai, L.; Ragauskas, A.J.; Yoo, C.G. Effects of the advanced organosolv pretreatment strategies on structural properties of woody biomass. *Ind. Crops Prod.* **2020**, *146*, 112144-112155.
15. Ferreira, J.A.; Taherzadeh, M.J. Improving the economy of lignocellulose-based biorefineries with organosolv pretreatment. *Bioresour. Technol.* **2020**, *299*, 122695-122707.
16. Zhou, Z.; Lei, F.; Li, P.; Jiang, J. Lignocellulosic biomass to biofuels and biochemicals: A comprehensive review with a focus on ethanol organosolv pretreatment technology. *Biotechnol. Bioeng.* **2018**, *115*, 2683-2702.
17. Palmqvist, E.; Hahn-Hägerdal, B.; Galbe, M.; Zacchi, G. The effect of water-soluble inhibitors from steam-pretreated willow on enzymatic hydrolysis and ethanol fermentation. *Enzyme Microb. Technol.* **1996**, *19*, 470-476.
18. Grzenia, D.L.; Schell, D.J.; Wickramasinghe, S.R. Membrane extraction for removal of acetic acid from biomass hydrolysates. *J. Membr. Sci.* **2008**, *322*, 189-195.
19. Martinez, A.; Rodriguez, M.E.; York, S.W.; Preston, J.F.; Ingram, L.O. Effects of Ca(OH)<sub>2</sub> treatments ("overliming") on the composition and toxicity of bagasse hemicellulose hydrolysates. *Biotechnol. Bioeng.* **2000**, *69*, 526-536.
20. Villarreal, M.; Prata, A.; Felipe, M.; Silva, J.A.E. Detoxification procedures of eucalyptus hemicellulose hydrolysate for xylitol production by *Candida guilliermondii*. *Enzyme Microb. Technol.* **2006**, *40*, 17-24.
21. Nilvebrant, N.O.; Reimann, A.; Larsson, S.; Jönsson, L.J. Detoxification of lignocellulose hydrolysates with ion-exchange resins. *Appl. Biochem. Biotechnol.* **2001**, *91*, 35-49.
22. Wilson, J.J.; Deschatelets, L.; Nishikawa, N.K. Comparative fermentability of enzymatic and acid hydrolysates of steam-pretreated aspenwood hemicellulose by *Pichia stipitis* CBS 5776. *Appl. Microbiol. Biotechnol.* **1989**, *31*, 592-596.

23. Larsson, S.; Palmqvist, E.; Hahn-Hägerdal, B.; Tengborg, C.; Stenberg, K.; Zacchi, G.; Nilvebrant, N.O. The generation of fermentation inhibitors during dilute acid hydrolysis of softwood. *Enzyme Microb. Technol.* **1999**, *24*, 151-159.
24. Okuda, N.; Soneura, M.; Ninomiya, K.; Katakura, Y.; Shioya, S. Biological detoxification of waste house wood hydrolysate using *Ureibacillus thermosphaericus* for bioethanol production. *J. Biosci. Bioeng.* **2008**, *106*, 128-133.
